# Supplementary material
Source: Springer Nature journal article supplement (https://www.springermedizin.de/resource/supplementary/12933_2008_145_MOESM1_ESM.pdf/9539696)

**Men**

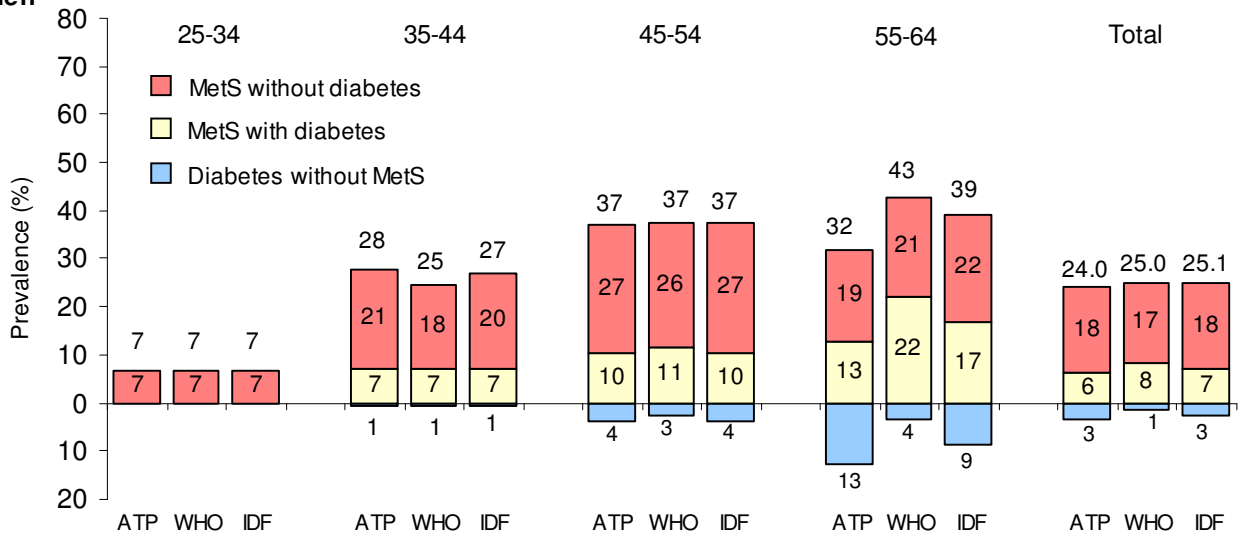

**Women**

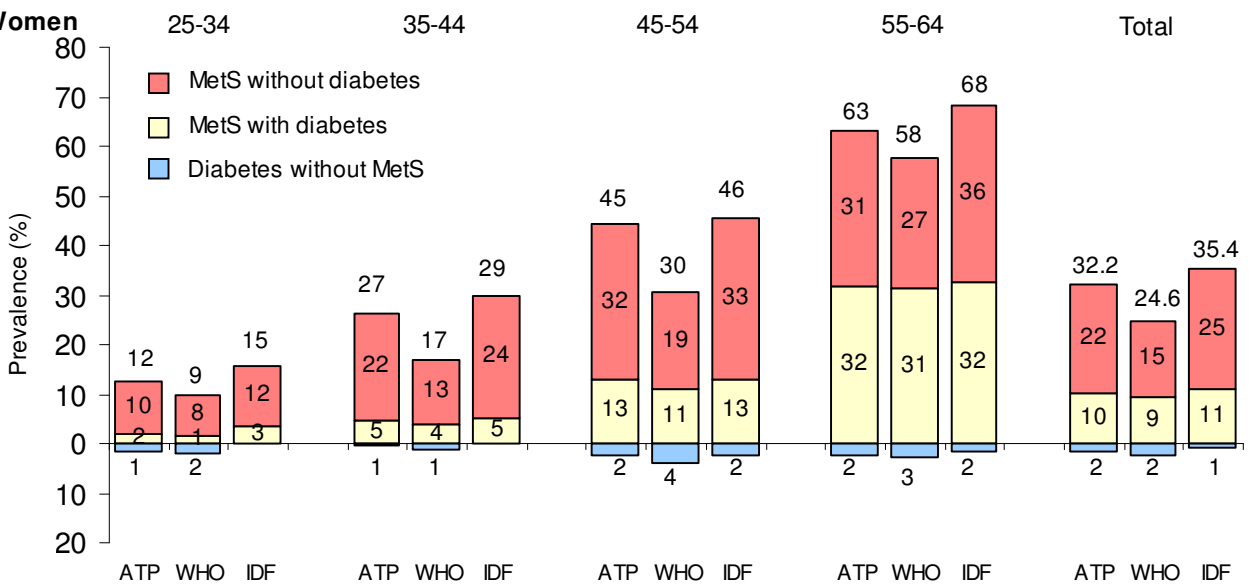

Supplement: MOESM1 [file 9539696]
